# Supplementary material
Source: publisher figshare collection journal article supplement (https://tandf.figshare.com/ndownloader/files/20137733)
Supplement: Supplementary file 1 [file 20137733]

**Supplementary material**

**Comparative study of statistical methods to identify a predictor for discharge at Orsova in the Lower Danube Basin**

**Ileana Mares et al.**

**Table S1**. The correlation coefficients (*R*), mutual information (MI), significance (*S*) assigned to MI, and nonlinear correlation coefficients (NLR) between Orsova discharge (*Q*) and five predictors (*P*). Bold and italic figures for *R* represent the values of correlation coefficients with a confidence level (CL) ≥ 99% and respective 95% (e.g. *R* ≥ 0.354 and respectively *R* ≥ 0.273). In the first column, the figure in brackets is the lag between *Q* and the five predictors. For MI, the CL is indicated only for cases with *S* > 85%, and the cases with *S* > 95% are in bold.

| *Q*_*X* (1948–2000); *P*_*X*(1948–2000)  *X*-season | *P*  *R*  MI  *S*  NLR | GBOI | NAOI | ABI | AEBI | EBI |
| --- | --- | --- | --- | --- | --- | --- |
| *Q*_SPR / *P*_SPR(0) | *R* (*Q*:*P*) | **0.455** | -0.189 | -0.123 | ***-0.278*** | **-0.357** |
| MI(*Q*:*P*) | **0.205** | 0.093 | 0.081 | **0.175** | 0.099 |
| *S* (CL) | **3.915** (>99%) | 0.999 | 0.615 | **2.628** (99%) | 1.094 |
| NLR (*Q*;*P*) | **0.580** | 0.412 | 0.386 | **0.544** | 0.424 |
| *Q*_SUM / *P*_SUM(0) | *R* (*Q*:*P*) | 0.081 | -0.039 | -0.139 | -0.126 | -0.117 |
| MI(*Q*:*P*) | 0.119 | 0.058 | 0.077 | 0.055 | 0.102 |
| *S* | 1.459 (85%) | 0.001 | 0.478 | -0.059 | 1.049 |
| NLR (*Q*;*P*) | 0.461 | 0.332 | 0.378 | 0.323 | 0.429 |
| *Q*_FALL / *P*_FALL(0) | *R* (*Q*:*P*) | **0.515** | -0.168 | 0.017 | -0.088 | -0.241 |
| MI(*Q*:*P*) | **0.310** | 0.084 | 0.037 | 0.037 | 0.051 |
| *S* | **6.482**(>99%) | 0.688 | -0.531 | -0.460 | -0.156 |
| NLR (*Q*;*P*) | **0.679** | 0.393 | 0.268 | 0.268 | 0.312 |
| *Q*_WIN / *P*_WIN(0) | *R* (*Q*:*P*) | **0.475** | -0.229 | -0.088 | -0.269 | ***-0.342*** |
| MI(*Q*:*P*) | **0.175** | 0.034 | 0.055 | 0.117 | **0.174** |
| *S* | **2.779**>99%) | -0.529 | -0.039 | 1.466 (86%) | **2.413** (98%) |
| NLR (*Q*;*P*) | **0.544** | 0.257 | 0.322 | 0.457 | **0.543** |
| *Q*_SPR/ *P*_WIN  (1) | *R* (*Q*:*P*) | **0.526** | ***-***0.266 | 0.138 | -0.184 | **-0.538** |
| MI(*Q*:*P*) | **0.212** | 0.117 | 0.055 | 0.069 | **0.182** |
| *S* | **3.021**(>99%) | 1.429 85%) | -0.074 | 0.134 | **2.663** (99%) |
| NLR (*Q*;*P*) | **0.587** | 0.457 | 0.323 | 0.358 | **0.552** |
| *Q*_SUM / *P*_WIN  (2) | *R* (*Q*:*P*) | 0.229 | -0.178 | -0.117 | -0.244 | ***-***0.246 |
| MI(*Q*:*P*) | 0.078 | 0.080 | 0.029 | 0.067 | 0.051 |
| *S* | 0.582 | 0.544 | -0.717 | 0.172 | -0.105 |
| NLR (*Q*;*P*) | 0.380 | 0.385 | 0.236 | 0.354 | 0.310 |
| *Q*_FALL /  *P*_WIN  (3) | *R* (*Q*:*P*) | 0.062 | -0.083 | -0.053 | 0.010 | 0.101 |
| MI(*Q*:*P*) | 0.114 | 0.046 | 0.020 | 0.015 | 0.055 |
| *S* | 1.267 | -0.280 | -0.921 | -1.048 | -0.069 |
| NLR (*Q*;*P*) | 0.451 | 0.297 | 0.199 | 0.171 | 0.323 |
| *Q*_SUM / *P*_SPR  (1) | *R* (*Q*:*P*) | 0.203 | 0.113 | -0.143 | -0.222 | -0.250 |
| MI(*Q*:*P*) | 0.046 | 0.055 | 0.149 | 0.117 | 0.067 |
| *S* | -0.296 | -0.087 | **2.240(97%)** | 1.553 (88%) | 0.242 |
| NLR (*Q*;*P*) | 0.295 | 0.322 | **0.508** | 0.457 | 0.354 |
| *Q_X* (1949–2000); *P*_*X* (1948–1999) | *P*  *R*  MI  *S*  NLR | GBOI | NAOI | ABI | AEBI | EBI |
| *Q*_FALL / *P*_SPR  (2) | *R* (*Q*:*P*) | 0.066 | -0.086 | -0.187 | -0.228 | -0.107 |
| MI(*Q*:*P*) | 0.060 | 0.030 | 0.046 | 0.055 | 0.016 |
| *S* | 0.057 | -0.679 | -0.253 | -0.066 | -1.025 |
| NLR (*Q*;*P*) | 0.335 | 0.243 | 0.297 | 0.322 | 0.176 |
| *Q*_FALL / *P*_SUM  (1) | *R* (*Q*:*P*) | 0.210 | -0.037 | -0.051 | -0.072 | -0.120 |
| MI(*Q*:*P*) | 0.123 | 0.046 | 0.117 | **0.170** | 0.038 |
| *S* | 1.670 (90%) | -0.275 | 1.410 (84%) | **2.641 (99%)** | -0.449 |
| NLR (*Q*;*P*) | 0.467 | 0.297 | 0.457 | **0.537** | 0.271 |
| *Q*_WIN / *P*_SPR  (3) | *R* (*Q*:*P*) | 0.143 | -0.122 | -0.196 | ***-0.329*** | -0.247 |
| MI(*Q*:*P*) | 0.075 | 0.090 | 0.129 | **0.172** | 0.003 |
| *S* | 0.388 | 0.733 | 1.686 (90%) | **2.724** (>99%) | -1.360 |
| NLR (*Q*;*P*) | 0.373 | 0.406 | 0.478 | **0.540** | 0.075 |
| *Q*_WIN / *P*_SUM  (2) | *R* (*Q*:*P*) | 0.026 | -0.110 | -0.041 | -0.096 | -0.137 |
| MI(*Q*:*P*) | 0.068 | 0.018 | 0.061 | 0.097 | 0.058 |
| *S* | 0.178 | -0.976 | 0.034 | 0.834 | -0.058 |
| NLR (*Q*;*P*) | 0.357 | 0.186 | 0.340 | 0.419 | 0.330 |
| *Q*_WIN / *P*_FALL  (1) | *R* (*Q*:*P*) | **0.502** | -0.131 | -0.115 | -0.175 | -0.242 |
| MI(*Q*:*P*) | **0.231** | 0.003 | 0.066 | 0.062 | 0.070 |
| *S* | **3.893** (>99%) | -1.389 | 0.247 | 0.150 | 0.271 |
| NLR (*Q*;*P*) | **0.608** | 0.075 | 0.350 | 0.341 | 0.361 |
| *Q*_SPR /  *P*_SUM  (3) | *R* (*Q*:*P*) | 0.077 | -0.077 | -0.090 | -0.176 | -0.262 |
| MI(*Q*:*P*) | 0.047 | 0.125 | 0.003 | 0.072 | **0.181** |
| *S* | -0.209 | 1.733(92%) | -1.327 | 0.345 | **2.738** (>99%) |
| NLR (*Q*;*P*) | 0.301 | 0.471 | 0.075 | 0.365 | **0.551** |
| *Q*_SPR /  *P*_FALL  (2) | *R* (*Q*:*P*) | 0.214 | 0.115 | -0.163 | -0.078 | 0.012 |
| MI(*Q*:*P*) | 0.094 | 0.018 | 0.084 | 0.049 | 0.045 |
| *S* | 0.700 | -0.953 | 0.697 | -0.262 | -0.319 |
| NLR (*Q*;*P*) | 0.415 | 0.186 | 0.393 | 0.306 | 0.294 |
| *Q*_SUM /  *P*_FALL  (3) | *R* (*Q*:*P*) | 0.062 | 0.116 | 0.070 | -0.142 | -0.271 |
| MI(*Q*:*P*) | 0.035 | 0.075 | 0.026 | 0.025 | 0.112 |
| *S* | -0.590 | 0.356 | -0.773 | -0.816 | 1.255 |
| NLR (*Q*;*P*) | 0.260 | 0.374 | 0.226 | 0.219 | 0.448 |

**Table S2.** Skewness for the discharge (*Q*) and the five predictors, for each season (1948–2000).

| *Q*,Predictor  Season | Q | GBOI | NAOI | ABI | AEBI | EBI |
| --- | --- | --- | --- | --- | --- | --- |
| SPR | 0.365 | -0.089 | 0.151 | -0.146 | -0.195 | -0.122 |
| SUM | 0.718 | 0.083 | 0.234 | -2.694 | -2.193 | -0.843 |
| FALL | 1.119 | -.167 | -0.058 | -0.836 | -0.319 | 0.102 |
| WIN | -0.256 | .066 | -0.244 | 0.070 | -0.312 | -0.042 |

a)

b)

**Figure S1.** Histograms for (a) *Q*_FALL and (b) AEBI_SUM. Both time series are standardized.

**Figure S2**. Scatterplots of the variables *Q*_FALL (x1) and AEBI_SUM (x2), and GBOI_SUM (x3).

**Figure S3.** Scatterplots of the variables Q_WIN (x1), GBOI_WIN (x2) and

NAOI_WIN (x3).
